# Supplementary material for: Controlled chiral electrochromism of polyoxometalates incorporated in supramolecular complexes
Source: Royal Society of Chemistry journal article supplement (doi:10.1039/c5cc10033j), 2016-01-01
Supplement: c5cc10033j1.pdf [file c5cc10033j1.pdf]

## Supplementary Information

### Controlled Chiral Electrochromism of Polyoxometalates Incorporated in Supramolecular Complexes

Bin Zhang, Weiming Guan, Simin Zhang, Bao Li\* and Lixin Wu\*

*State Key Laboratory of Supramolecular Structure and Materials, College of Chemistry, Jilin University, Changchun 130012, China. E-mail: libao@jlu.edu.cn, wulx@jlu.edu.cn*

#### Materials

1-adamantanamine hydrochloride (AdH) was purchased from J&K Chemical Co, Ltd. and was used without any further purification.  $\beta$ -Cyclodextrin (CD) was the product of Sinopharm Chemical Reagent Co, Ltd. (SCRC) and was recrystallized three times before use.  $H_4[PMo_{11}VO_{40}] \cdot 32.5H_2O$  ( $PMo_{11}V$ ) was synthesized according to the literature<sup>[1]</sup>.  $H_3PMo_{12}O_{40}$  ( $PMo_{12}$ ) and the remaining chemicals were purchased from Beijing Chemical Reagent Company. Doubly distilled water was used in the experiments.

#### Measurements

FT-IR spectra were carried out on a Bruker Vertex 80V FT-IR spectrometer equipped with a DTGS detector (32 scans) at a resolution of  $4\text{ cm}^{-1}$  by using KBr pellet. The UV-Vis spectra were recorded on a spectrometer (Varian CARY 50 Probe).  $^1H$  NMR spectra were taken on a Bruker AVANCE 500 and 600 MHz spectrometer. Chemical shifts were referenced to the solvent values ( $\delta = 4.79$  ppm for  $D_2O$ ). Circular dichroism spectra (CDS) were performed on a Bio-Logic MOS-450 spectropolarimeter in water with a step size of 0.5-nm and speed of  $4\text{ nm s}^{-1}$  at  $25\text{ }^\circ\text{C}$ . Solid CDS was collected with the same spectropolarimeter on a KBr pellet. Optical rotation values were obtained with a WZZ-3 automatic polarimeter equipping with sodium lamp ( $\lambda = 589.44\text{ nm}$ ). Electrochemical measurements were tested by CHI 660C electrochemical workstation at room temperature under nitrogen atmosphere. A three electrode electrochemical cell containing a platinum wire as the counter electrode, an Ag/AgCl as reference electrode and a glassy carbon electrode (GCE) as the working electrode was used in the measurement. ITC data was collected by TAM III microcalorimetric (TA) system with a stainless steel sample cell.

#### Sample Preparations

**$\beta$ -CD:**  $\beta$ -CD (100 mg, 0.088 mmol) was dissolved in 10 ml water with stirring at room temperature for 6 h, then let the resulting solution stand 2 h for test.

**$\beta$ -CD-AdH:**  $\beta$ -CD (100 mg, 0.088 mmol) and AdH (16.54 mg, 0.088 mmol) in 10 ml water was stirred at room temperature for 6 h, then the solution aged 2 h for further experiments.

**$\beta$ -CD-AdH- $PMo_{11}V$ :**  $\beta$ -CD (63.56 mg, 0.056 mmol) and AdH (10.52 mg, 0.056 mmol)

dissolving in 4 ml distilled water was stirred at room temperature for 2 h. Then  $\text{PMo}_{11}\text{V}$  (3.31 mg, 0.014 mmol) in 6 ml distilled water was added dropwise into the  $\beta\text{-CD-AdH}$  solution by continually stirring at room temperature for 2 h. The resulting solution ( $\beta\text{-CD:AdH:PMo}_{11}\text{V}$  at molar ratio 4:4:1) was allowed to stand for 4 h for measurement.

**Solid sample of  $\beta\text{-CD-AdH-PMo}_{11}\text{V}$ :** The solid sample was prepared by freeze-drying the aqueous sample of  $\beta\text{-CD-AdH-PMo}_{11}\text{V}$ .

**$\beta\text{-CD-AdH-PMo}_{12}$ :** The sample with  $\beta\text{-CD:AdH:PMo}_{12}$  molar ratio at 3:3:1 was prepared similar as that of  $\beta\text{-CD-AdH-PMo}_{11}\text{V}$ .

**$\beta\text{-CD-PMo}_{12}$ :** The sample was prepared according to the literature.<sup>[2]</sup>

### Characterizations

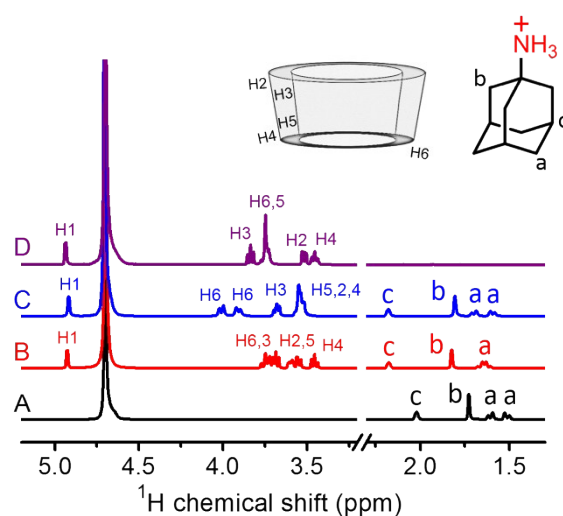

**Fig. S1**  $^1\text{H}$  NMR spectra of (A) AdH, (B)  $\beta\text{-CD-AdH}$  (1:1 molar ratio), (C)  $\beta\text{-CD-AdH-PMo}_{11}\text{V}$  (4:4:1 molar ratio), and (D)  $\beta\text{-CD}$  in  $\text{D}_2\text{O}$  at 25 °C.

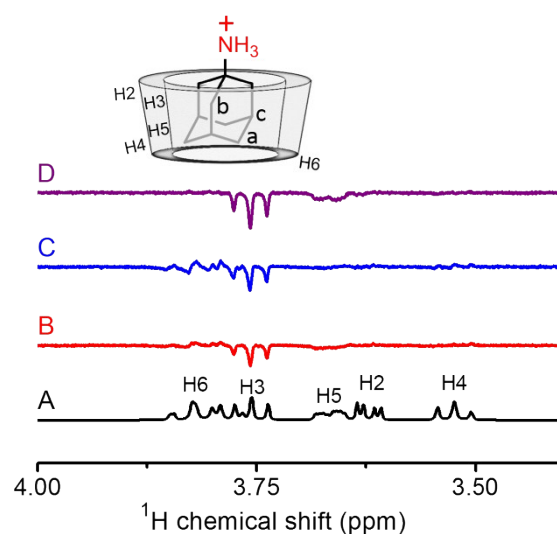

**Fig. S2**  $^1\text{H}$  NMR spectrum of (A)  $\beta\text{-CD}$  in  $\beta\text{-CD-AdH}$  inclusion complex  $\text{D}_2\text{O}$  solution at 25 °C and corresponding 1D selective Gradient NOESY spectra, irradiated with the frequency belonging to

AdH at (B) 1.712 ppm for H<sub>a</sub>, (C) 1.914 for H<sub>b</sub>, and (D) 2.260 ppm for H<sub>c</sub>.

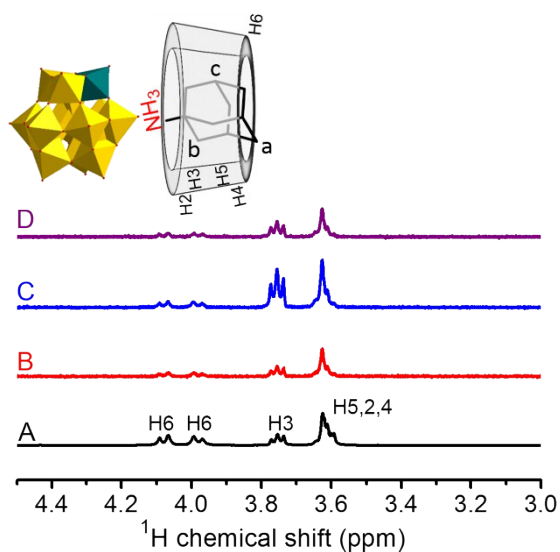

**Fig. S3** <sup>1</sup>H NMR spectra of (A) β-CD-AdH-PMo<sub>11</sub>V in D<sub>2</sub>O at 25 °C and corresponding 1D selective Gradient NOESY NMR spectra, irradiated with the frequency belonging to AdH at (B) 1.610–1.719 ppm for H<sub>a</sub>, (C) 1.835 for H<sub>b</sub>, and (D) 2.200 ppm for H<sub>c</sub>.

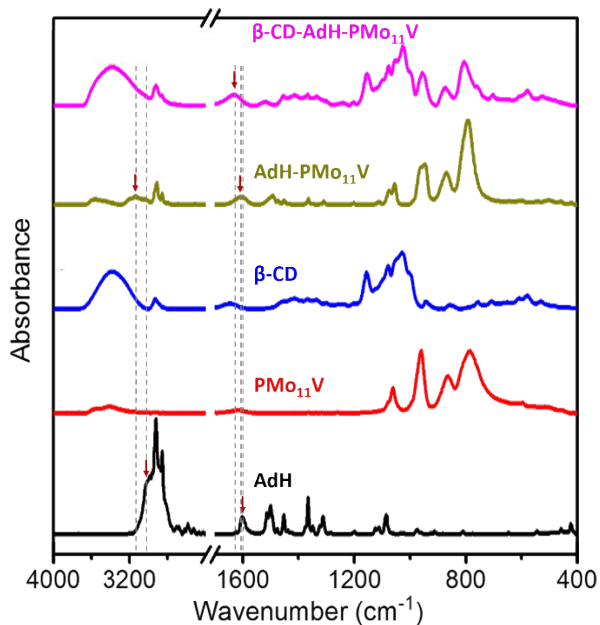

**Fig. S4** FT-IR spectra of AdH, PMo<sub>11</sub>V, β-CD, AdH-PMo<sub>11</sub>V and β-CD-AdH-PMo<sub>11</sub>V in KBr pellets.

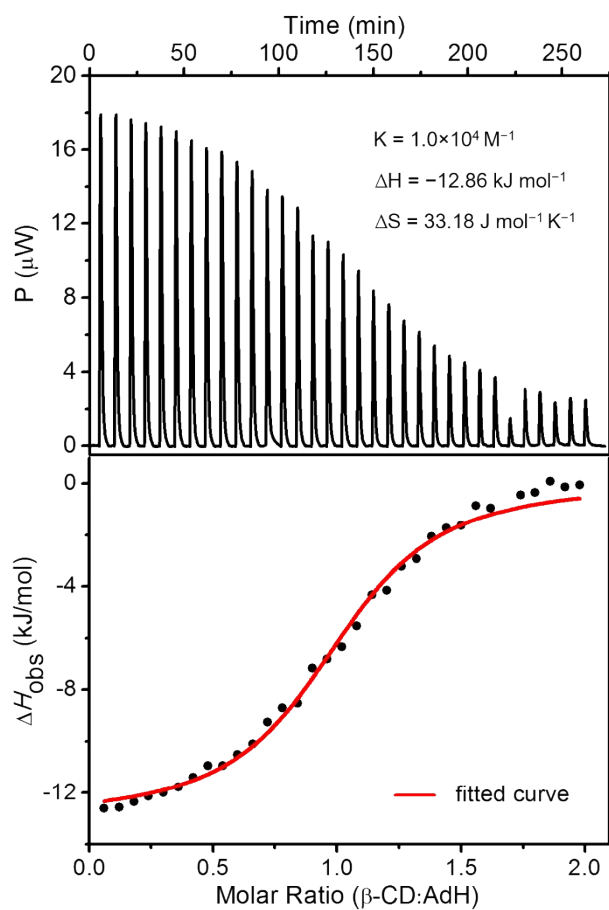

**Fig. S5** ITC curve and corresponding plot of observed enthalpy changes ( $\Delta_{\text{obs}}$ ) against  $\beta$ -CD:AdH molar ratio by titrating 9.0 mM  $\beta$ -CD into 2.5 mM AdH aqueous solution, where  $\Delta_{\text{obs}}$  values are expressed in terms of  $\text{kJ mol}^{-1}$  of  $\beta$ -CD and the dilution enthalpy of  $\beta$ -CD has been deducted.

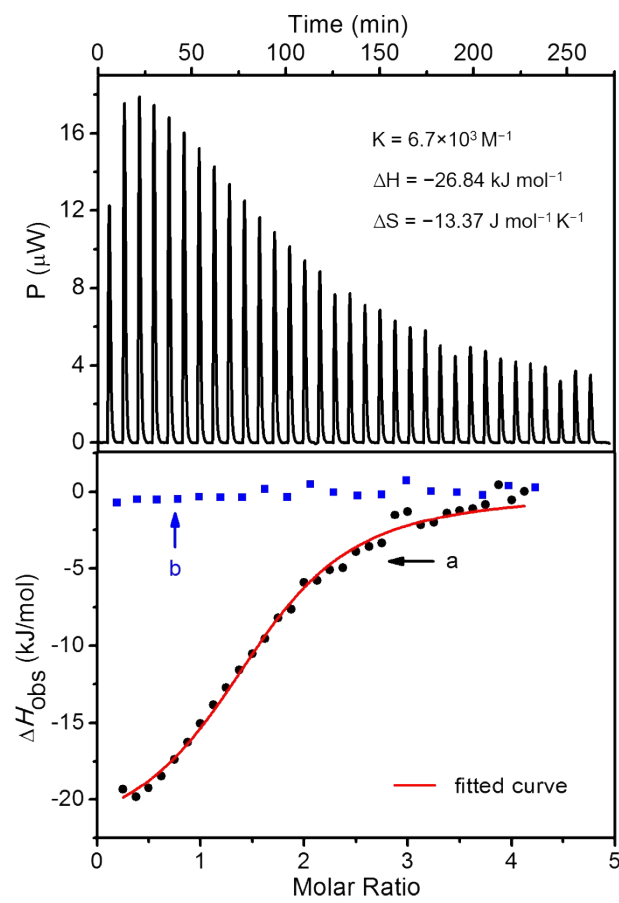

**Fig. S6** ITC curve and corresponding plots of observed enthalpy changes ( $\Delta_{\text{obs}}$ ) against (a)  $\beta$ -CD-AdH:PMo<sub>11</sub>V by titrating 6.0 mM  $\beta$ -CD-AdH into 0.8 mM PMo<sub>11</sub>V aqueous solution and (b)  $\beta$ -CD:PMo<sub>11</sub>V by titrating 6.0 mM  $\beta$ -CD into 0.8 mM PMo<sub>11</sub>V aqueous solution. The  $\Delta_{\text{obs}}$  values are in terms of kJ mol<sup>-1</sup> of  $\beta$ -CD-AdH and the dilution enthalpy of  $\beta$ -CD-AdH has been deducted.

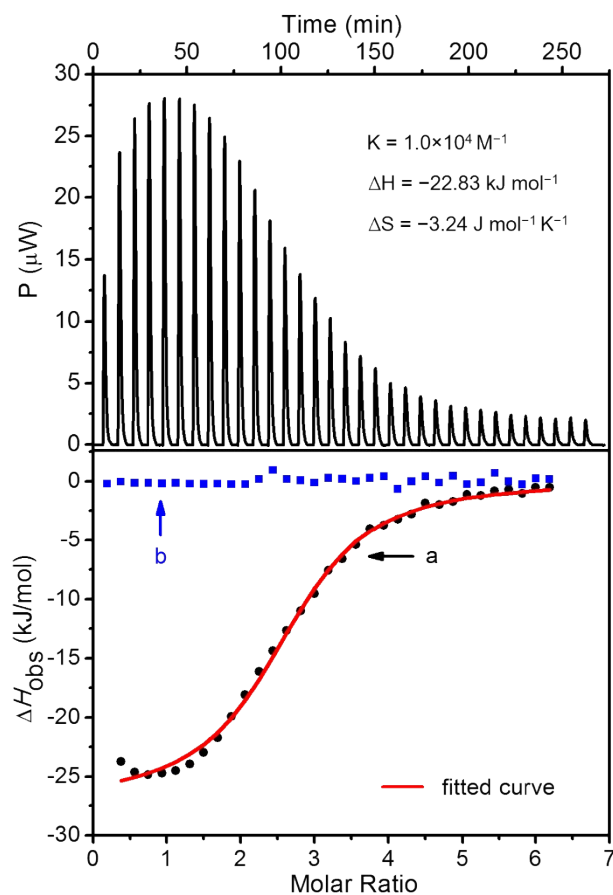

**Fig. S7** ITC curve and corresponding plots of observed enthalpy changes ( $\Delta_{\text{obs}}$ ) against (a)  $\beta\text{-CD-AdH:PMo}_{12}$  by titrating 9.0 mM  $\beta\text{-CD-AdH}$  into 0.8 mM  $\text{PMo}_{12}$  aqueous solution and (b)  $\beta\text{-CD:PMo}_{12}$  by titrating 9.0 mM  $\beta\text{-CD}$  into 0.8 mM  $\text{PMo}_{12}$  aqueous solution. The  $\Delta_{\text{obs}}$  values are in terms of  $\text{kJ mol}^{-1}$  of  $\beta\text{-CD-AdH}$  and the dilution enthalpy of  $\beta\text{-CD-AdH}$  has been deducted.

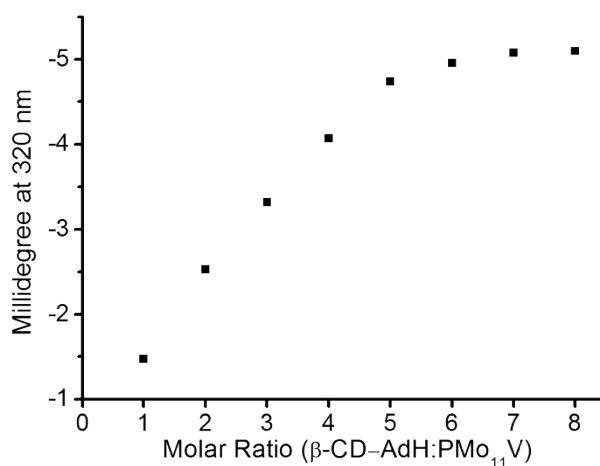

**Fig. S8** Plot of millidegree value in CDS of  $\beta\text{-CD-AdH-PMo}_{11}\text{V}$  at 320 nm versus the molar ratio of  $\text{PMo}_{11}\text{V}$  (concentration fixing at  $1.4 \times 10^{-3} \text{ mmol ml}^{-1}$ ) gradually increasing in order of  $\beta\text{-CD:AdH:PMo}_{11}\text{V}$  at 1:1:1, 2:2:1, 3:3:1, 4:4:1, 5:5:1, 6:6:1, 7:7:1 and 8:8:1.

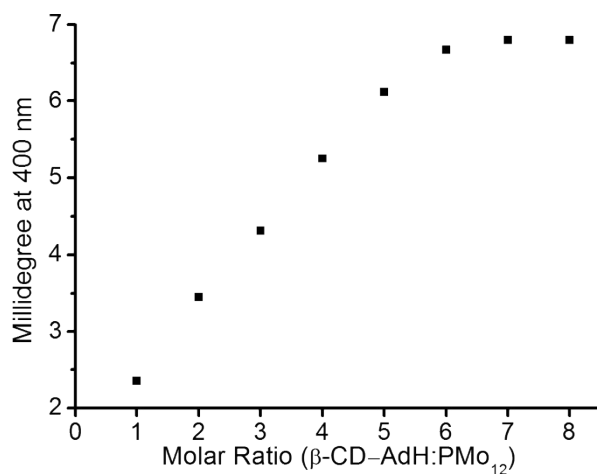

**Fig. S9** Plot of millidegree values in CDS of  $\beta$ -CD-AdH-PMO<sub>12</sub> at 400 nm versus the molar ratio of PMO<sub>12</sub> (concentration fixing at  $1.11 \times 10^{-3}$  mmol ml<sup>-1</sup>) gradually increasing in order of  $\beta$ -CD:AdH:PMO<sub>12</sub> at 1:1:1, 2:2:1, 3:3:1, 4:4:1, 5:5:1, 6:6:1, 7:7:1 and 8:8:1.

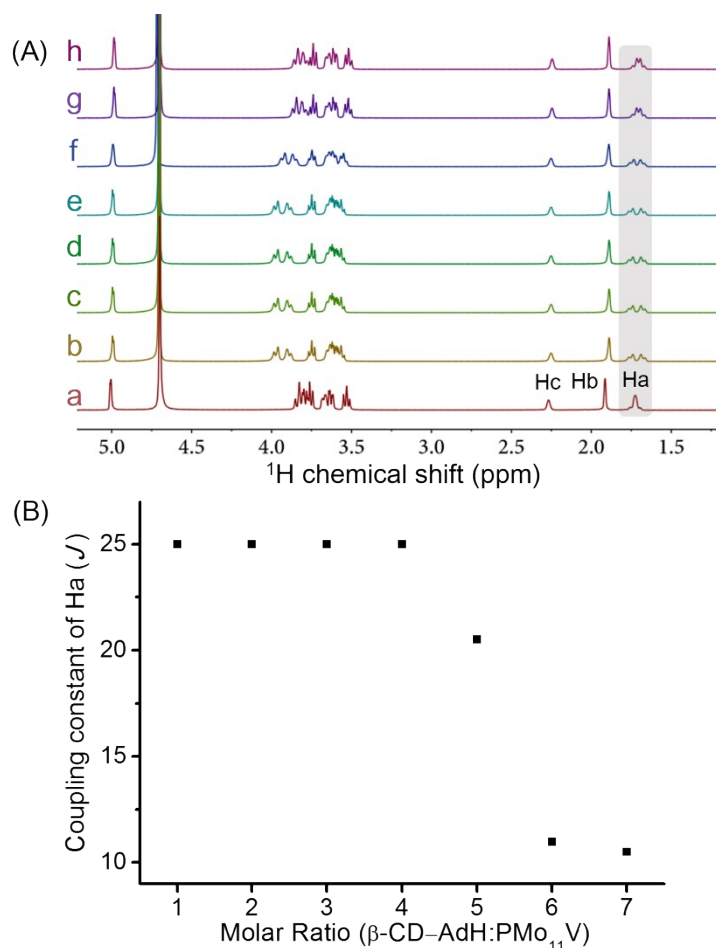

**Fig. S10** (A) <sup>1</sup>H NMR spectra of  $\beta$ -CD-AdH-PMO<sub>11V</sub> in D<sub>2</sub>O with a certain concentration of AdH at  $4.1 \times 10^{-2}$  mmol ml<sup>-1</sup> with the molar ratio of  $\beta$ -CD:AdH:PMO<sub>11V</sub> at (a) 1:1:0, (b) 1:1:1, (c) 2:2:1, (d) 3:3:1, (e) 4:4:1, (f) 5:5:1, (g) 6:6:1 and (h) 7:7:1, and (B) corresponding plot of Ha coupling constant versus the above molar ratio changes.

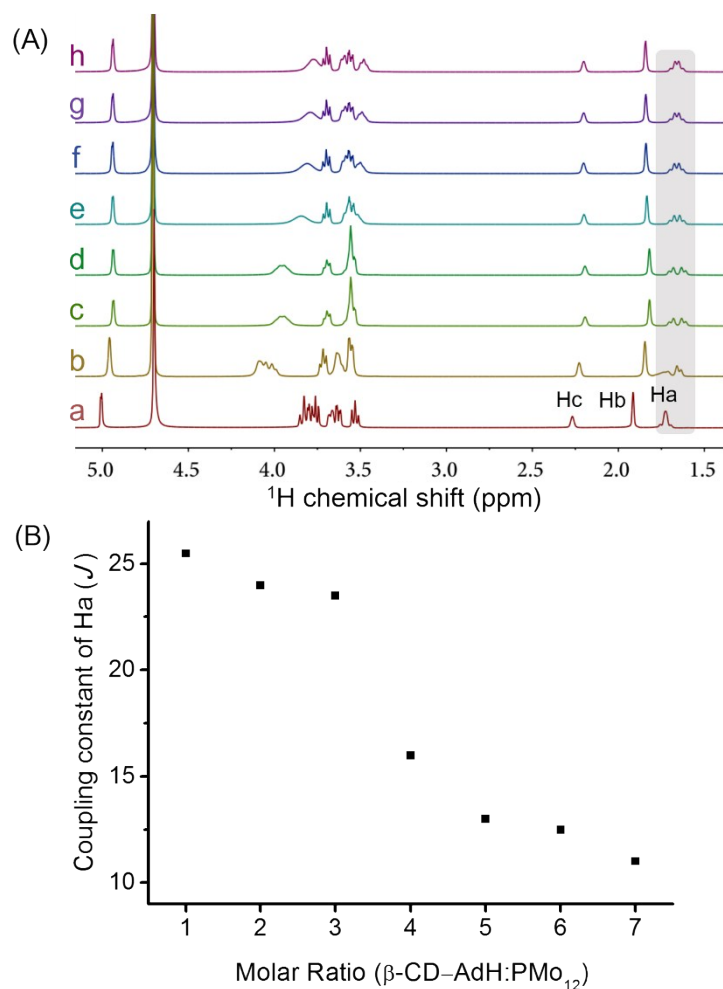

**Fig. S11** (A)  $^1\text{H}$  NMR spectra of  $\beta$ -CD-AdH-PMO<sub>12</sub> in D<sub>2</sub>O with a certain concentration of AdH at  $4.1 \times 10^{-2} \text{ mmol ml}^{-1}$  except (b)  $1 \times 10^{-2} \text{ mmol ml}^{-1}$  used considering the solubility, and the molar ratio of  $\beta$ -CD:AdH:PMO<sub>12</sub> set at (a) 1:1:0, (b) 1:1:1, (c) 2:2:1, (d) 3:3:1, (e) 4:4:1, (f) 5:5:1, (g) 6:6:1 and (h) 7:7:1, and (B) corresponding plot of Ha coupling constant versus the above molar ratio changes.

### Chiral migration characterization

**Table S1.** The summary of optical rotation values of  $\beta$ -CD,  $\beta$ -CD-AdH,  $\beta$ -CD-AdH-PMO<sub>11</sub>V and  $\beta$ -CD-AdH-PMO<sub>12</sub>.<sup>a</sup>

| Sample                                                  | Optical Rotation ( $[\alpha]^{20}_{\text{D}}$ ) <sup>b</sup> | Variance ( $\sigma_{n-1}$ ) <sup>c</sup> |
|---------------------------------------------------------|--------------------------------------------------------------|------------------------------------------|
| $\beta$ -CD                                             | 161.62                                                       | 0.286                                    |
| $\beta$ -CD-AdH (1:1 molar ratio)                       | 129.15                                                       | 0.187                                    |
| $\beta$ -CD-AdH-PMO <sub>11</sub> V (4:4:1 molar ratio) | 99.48                                                        | 0.232                                    |
| $\beta$ -CD-AdH-PMO <sub>12</sub> (3:3:1 molar ratio)   | 71.95                                                        | 0.187                                    |

<sup>a</sup> All sample solutions were prepared under a constant  $\beta$ -CD concentration of  $10 \text{ mg ml}^{-1}$  (8.8 mM), and the variable concentrations of other components depending on their molar ratio to  $\beta$ -CD.

<sup>b</sup> Each of optical rotation values is an average of six parallel tests.

<sup>c</sup> The variance is the dispersion degree of tests.



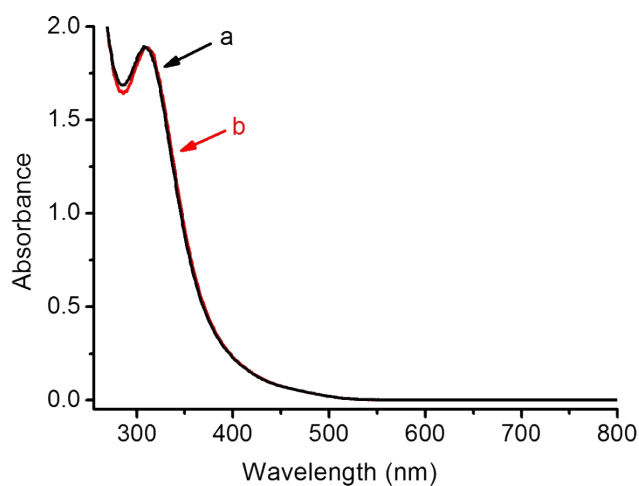

**Fig. S12** UV-Vis spectra of (a)  $\beta$ -CD- $\text{PMo}_{11}\text{V}$  and (b)  $\beta$ -CD-AdH- $\text{PMo}_{11}\text{V}$  in aqueous solution at room temperature.

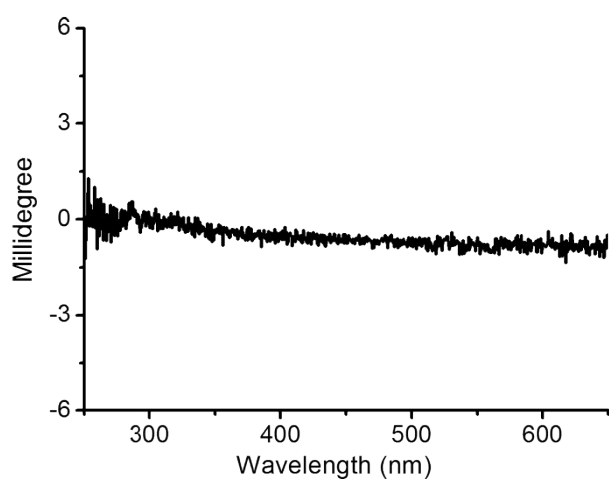

**Fig. S13** Solid CDS of  $\beta$ -CD- $\text{PMo}_{12}$  in KBr pellet.

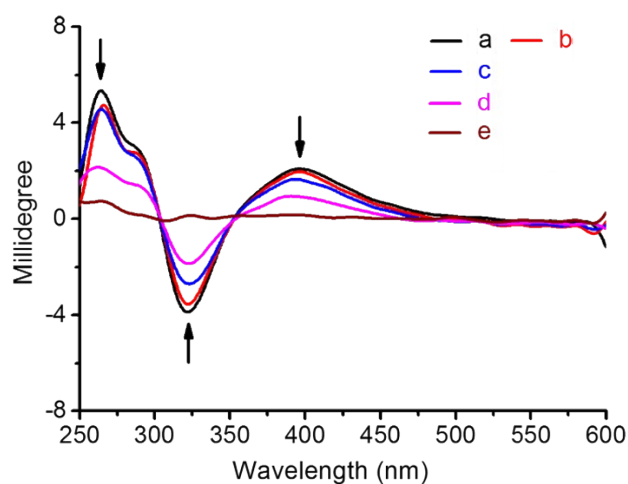

**Fig. S14** CDS of  $\beta$ -CD-AdH- $\text{PMo}_{11}\text{V}$  in aqueous solution with a certain concentration of  $\text{PMo}_{11}\text{V}$  at  $1.4 \times 10^{-3} \text{ mmol ml}^{-1}$  versus the molar ratio of  $\beta$ -CD:AdH: $\text{PMo}_{11}\text{V}$  at (a) 4:4:1, (b) 4:3:1, (c) 4:2:1, (d) 4:1:1, and (e) 4:0:1.

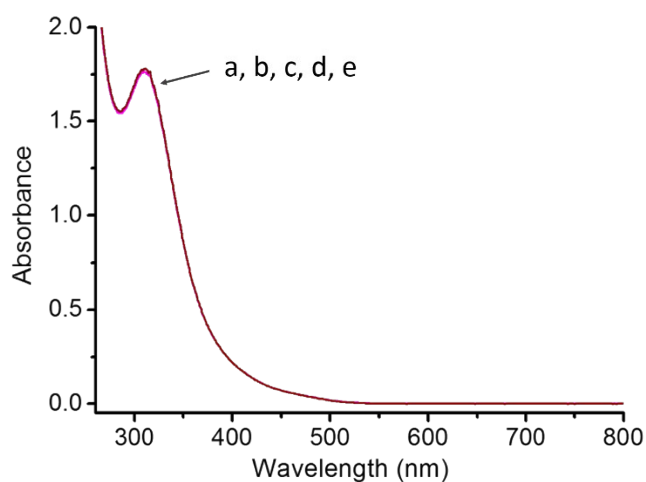

**Fig. S15** UV-Vis spectra of  $\beta$ -CD-AdH-PMo<sub>11</sub>V in aqueous solution used in corresponding to CDS in Fig S7, and there is no change of the absorption value because of the same concentration of PMo<sub>11</sub>V in the experiments.

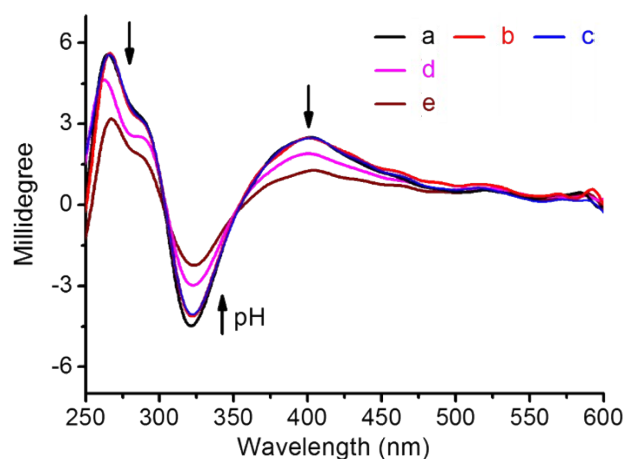

**Fig. S16** CDS of  $\beta$ -CD-AdH-PMo<sub>11</sub>V (4:4:1 molar ratio) in aqueous solution (PMo<sub>11</sub>V concentration fixing at  $1.4 \times 10^{-3}$  mmol ml<sup>-1</sup>) with gradually increasing pH from (a) 2.65, to (b) 2.86, (c) 3.48, (d) 5.36, and (e) 5.80, by adding dilute NaOH aqueous solution.

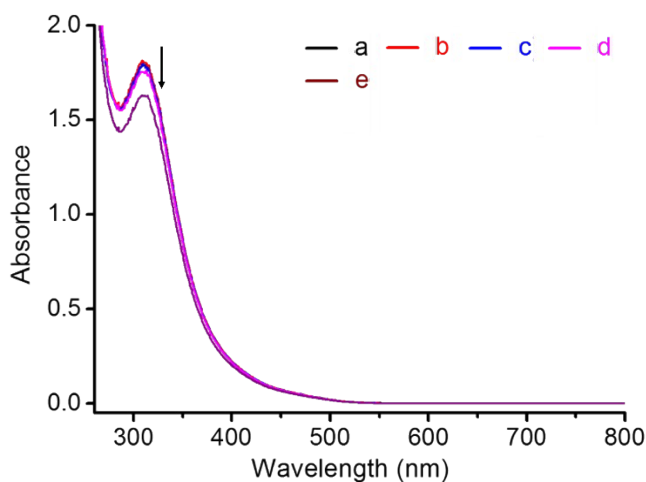

**Fig. S17** UV-Vis spectra of  $\beta$ -CD-AdH-PMo<sub>11</sub>V (4:4:1 molar ratio) in water at a fixed PMo<sub>11</sub>V

concentration of  $1.4 \times 10^{-3} \text{ mmol ml}^{-1}$  accompanied by gradually increasing pH from (a) 2.65, to (b) 2.86, (c) 3.48, (d) 5.36, and (e) 5.80, by adding dilute NaOH ( $5.6 \times 10^{-1} \text{ mmol ml}^{-1}$ ).

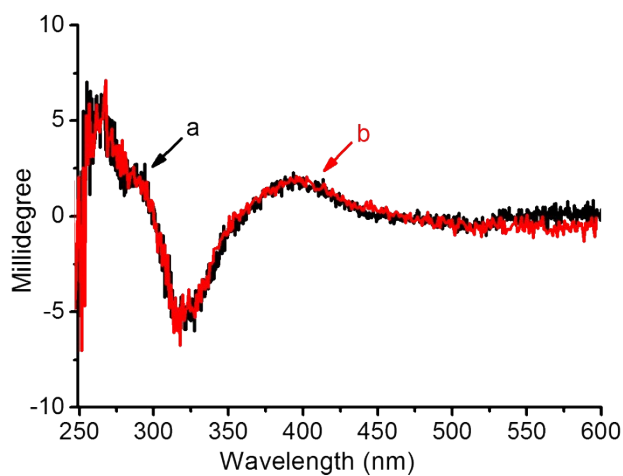

**Fig. S18** CDS of  $\beta$ -CD-AdH-PMo<sub>11</sub>V with the cluster concentration of  $1.4 \times 10^{-3} \text{ mmol ml}^{-1}$  in water prepared (a) freshly and (b) encountered several tens of days at 4 °C.

### Chiral Electrochromism Characterization

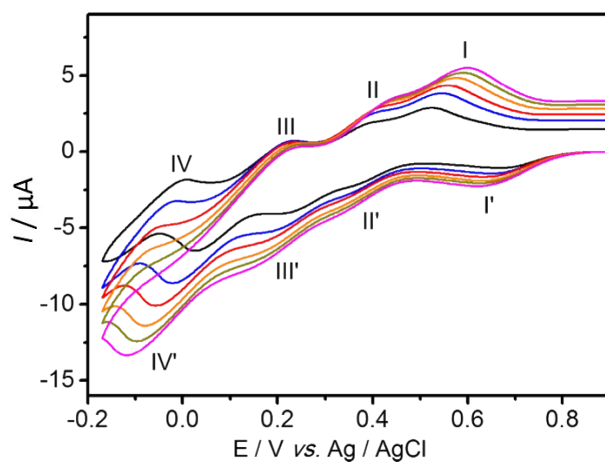

**Fig. S19** CVs of  $\beta$ -CD-AdH-PMo<sub>11</sub>V (4:4:1 molar ratio) aqueous solution with fixed PMo<sub>11</sub>V concentration ( $1.15 \times 10^{-2} \text{ mmol ml}^{-1}$ ) at scan rate of 50, 100, 150, 200, 250 and 300  $\text{mV s}^{-1}$  (from inner to outer) without adding any other electrolytes.

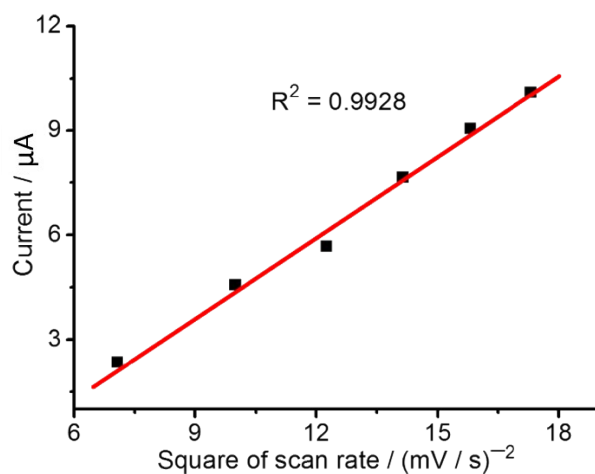

**Fig. S20** The plot of peak current of  $V^{IV}/V^V$  versus square root of scan speed (vs. Ag/AgCl), according to the CVs in Fig S12.

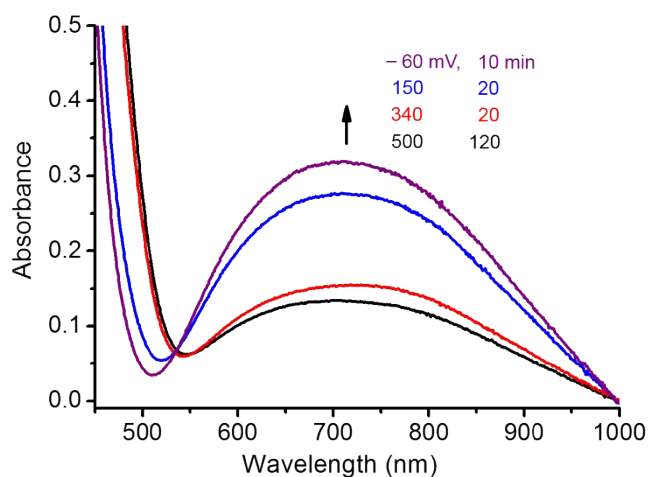

**Fig. S21** UV-Vis spectra of  $\beta$ -CD-AdH- $PMo_{11}V$  (4:4:1 molar ratio) with  $PMo_{11}V$  concentration of  $1.15 \times 10^{-2} \text{ mmol ml}^{-1}$  at different reduction state in aqueous solution.

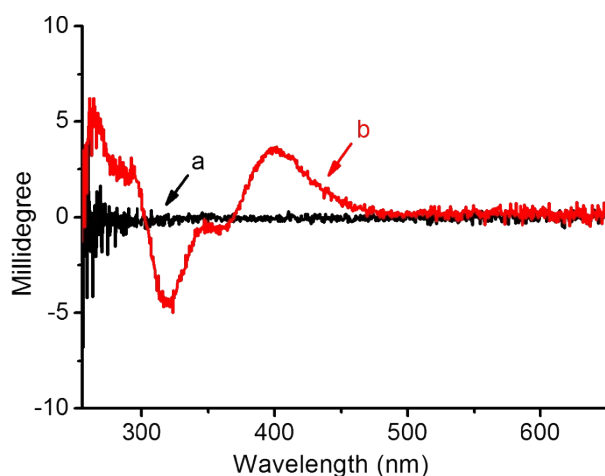

**Fig. S22** CDS of (a)  $\beta$ -CD- $PMo_{12}$  (3:1 molar ratio) and (b)  $\beta$ -CD-AdH- $PMo_{12}$  (3:3:1 molar ratio) with  $PMo_{12}$  concentration of  $1.11 \times 10^{-3} \text{ mmol ml}^{-1}$  in aqueous solution at room temperature.

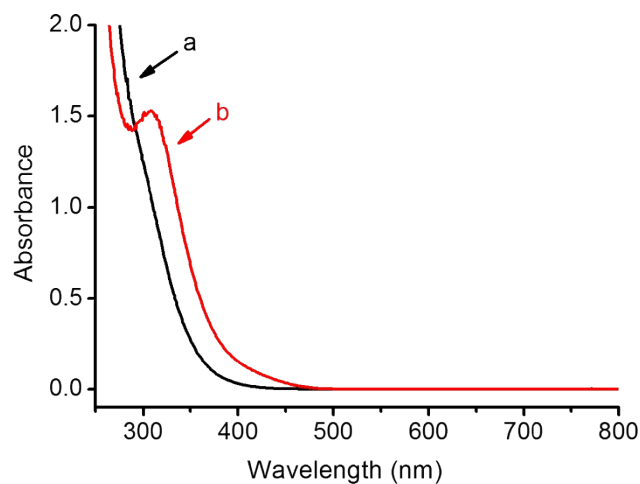

**Fig. S23** UV-Vis spectra of (a)  $\beta$ -CD- $\text{PMo}_{12}$  and (b)  $\beta$ -CD-AdH- $\text{PMo}_{12}$  in aqueous solution at room temperature.

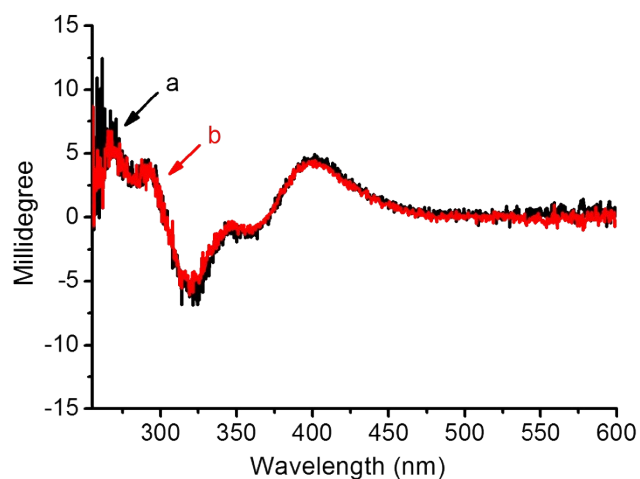

**Fig. S24** CDS of  $\beta$ -CD-AdH- $\text{PMo}_{12}$  (3:3:1 molar ratio) with  $\text{PMo}_{12}$  concentration of  $1.11 \times 10^{-3} \text{ mmol ml}^{-1}$  in aqueous solution (a) prepared freshly and (b) preserved for several tens of days at  $4^\circ\text{C}$ .

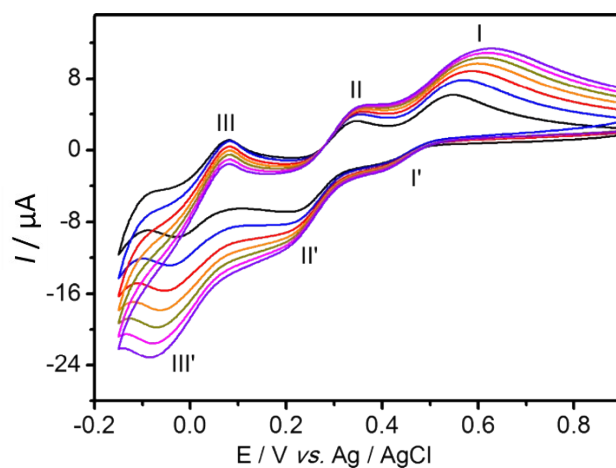

**Fig. S25** CVs of  $\beta$ -CD-AdH- $\text{PMo}_{12}$  (3:3:1 molar ratio) with  $\text{PMo}_{12}$  concentration of  $1.5 \times 10^{-2} \text{ mmol ml}^{-1}$  at scan rates of 50, 100, 150, 200, 250, 300 and  $350 \text{ mV s}^{-1}$  (from inner to outer) without adding any other electrolyte.

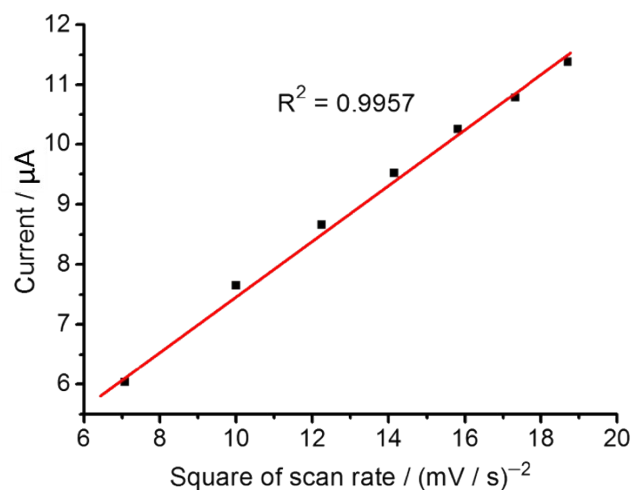

**Fig. S26** The plot of peak currents of Mo<sup>V</sup>/Mo<sup>VI</sup> versus the square root of scan speeds (vs. Ag/AgCl) where the data were taken from Fig. S18.

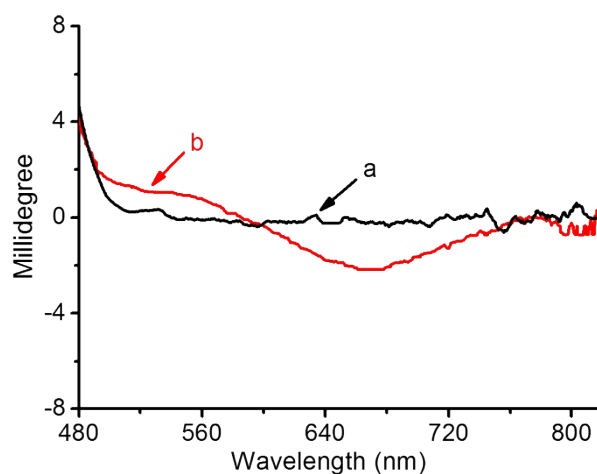

**Fig. S27** CDS of  $\beta$ -CD-AdH-PMo<sub>12</sub> (3:3:1 molar ratio) with PMo<sub>12</sub> concentration of  $1.5 \times 10^{-2}$  mmol ml<sup>-1</sup> in visible region at (a) initial state, and (b) after 120 min reduction under 340 mV.

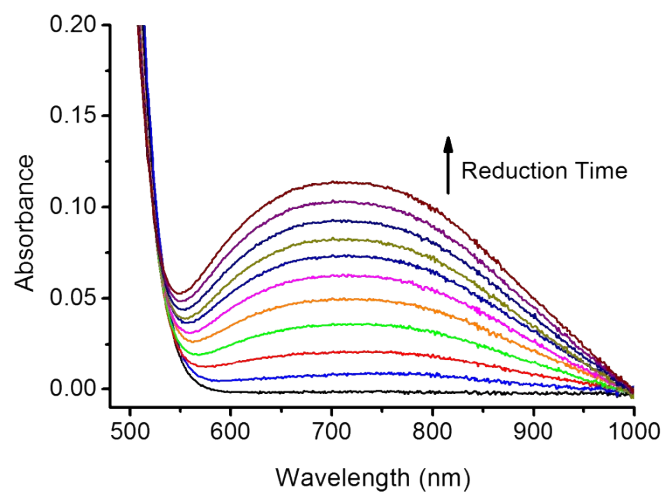

**Fig. S28** UV-Vis spectra of  $\beta$ -CD-AdH-PMo<sub>11</sub>V in aqueous solution at different reduction time, measured in every 800 s under the reduction voltage 500 mV.

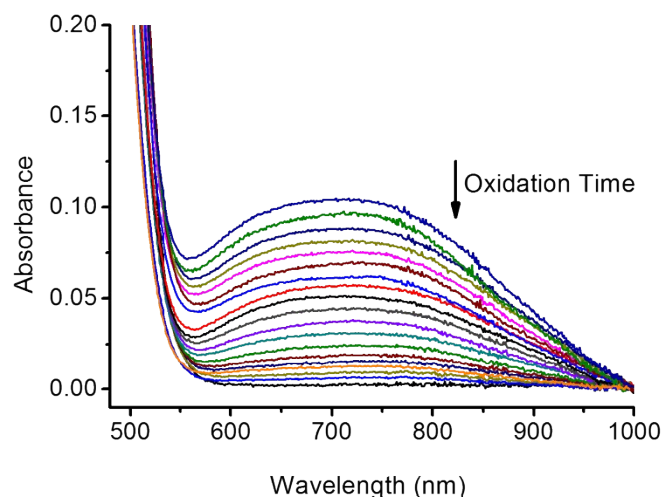

**Fig. S29** UV-Vis spectra of  $\beta$ -CD-AdH-PMo<sub>11</sub>V in aqueous solution at different oxidation time, which are measured with an interval of 400 s under oxidation voltage at 900 mV.

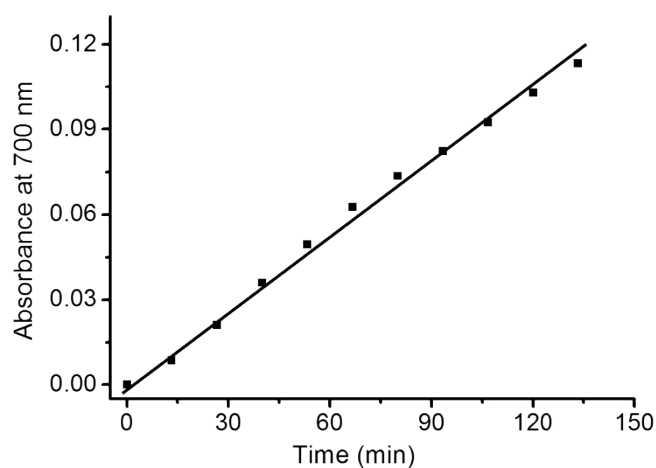

**Fig. S30** The absorbance plot of  $\beta$ -CD-AdH-PMo<sub>11</sub>V in aqueous solution at 700 nm versus the reduction times in every 800 s under 500 mV.

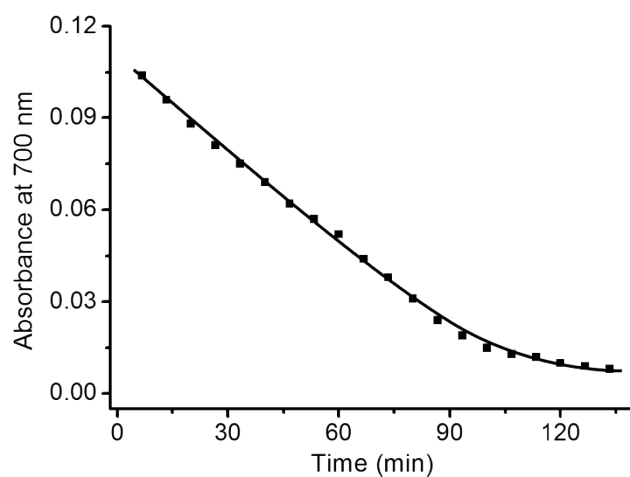

**Fig. S31** The absorbance plot of  $\beta$ -CD-AdH-PMo<sub>11</sub>V in aqueous solution at 700 nm versus the oxidation time in every 400 s under 900 mV.

## References

- [1] G. A. Tsigdinos and C. J. Hallada, *Inorg. Chem.*, 1968, **7**, 437.
- [2] Y. L. Wu, R. F. Shi, Y. L. Wu, J. M. Holcroft, Z. C. Liu, M. Frasconi, M. R. Wasielewski, H. Li and J. F. Stoddart, *J. Am. Chem. Soc.*, 2015, **137**, 4111.
